# Supplementary material for: Catalpol Enhances Random-Pattern Skin Flap Survival by Activating SIRT1-Mediated Enhancement of Autophagy
Source: Oxid Med Cell Longev. 2022 May 17;2022:5668226. doi: 10.1155/2022/5668226 (PMC9129999; doi:10.1155/2022/5668226)
Supplement: Supplementary Materials — Fig. S1: CAT alleviates ROS levels in random skin flaps. Quantification of the ROS production in flap tissues. Significance: ∗∗p < 0.01 vs. the control group. Data were expressed as means ± SEM, n = 6. [file 5668226.f1.docx]

**Supplementary material**

**Catalpol enhances random-pattern skin flap survival by activating SIRT1-mediated enhancement of autophagy**

**Ren-hao Jiang1,2, Chen-ji Dong1,2, Zhu-liu Chen1,2, Sheng Chen1,2, Jian-xin Yang1,2, Wei-yang Gao1,2***

**1**Department of Orthopaedics, The Second Affiliated Hospital and Yuying Children’s

Hospital of Wenzhou Medical University, Wenzhou 325027, China;

**2**Zhejiang Provincial Key Laboratory of Orthopaedics, Wenzhou 325027, China.

***Correspondence:**

Dr. Weiyang Gao, weiyanggaoi@126.com

1Department of Orthopaedics, The Second Affiliated Hospital and Yuying Children’s Hospital of Wenzhou Medical University, Wenzhou 325027, China.

2Zhejiang Provincial Key Laboratory of Orthopaedics, Wenzhou 325027, China.

**
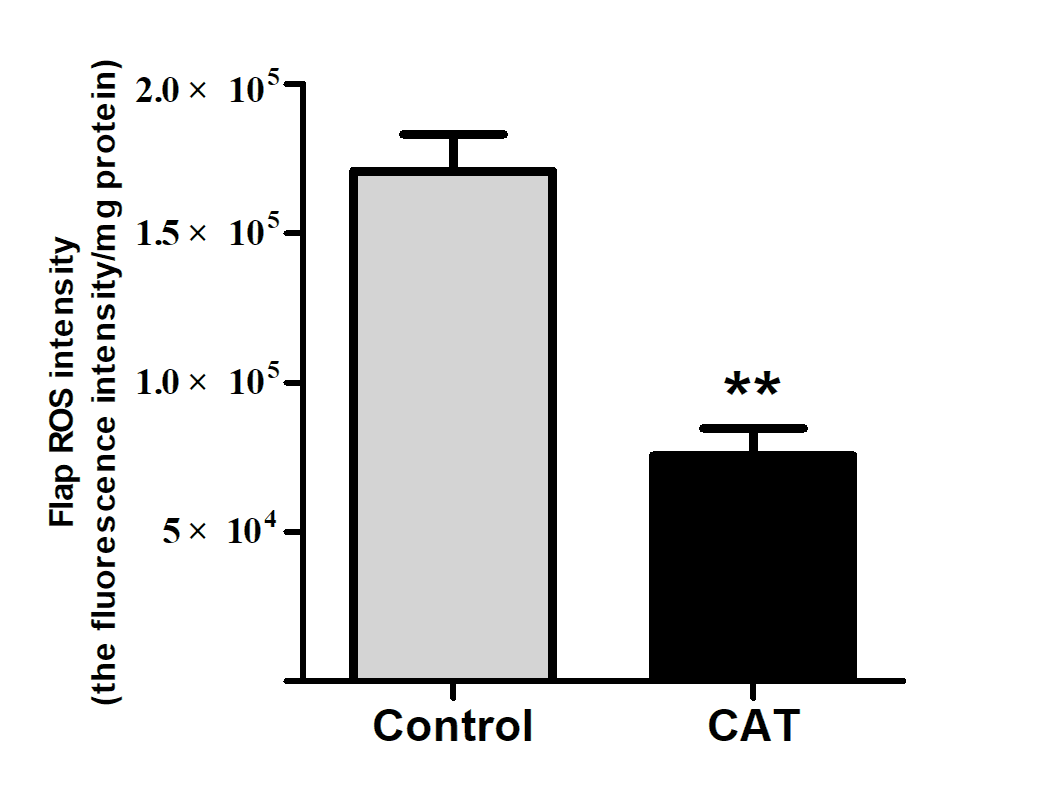
**

**Fig. S1** **CAT alleviates ROS levels in random skin flaps.** Quantification of the ROS production in flap tissues. Significance: **p < 0.01 vs. the Control group. Data were expressed as means ± SEM, n=6.
